# Supplementary material for: Synergistic Heavy Metal Remediation through a Novel Black Soldier Fly–Brassica juncea Cascade in Mining-Impacted Soils
Source: Research Square preprint supplement (doi:10.21203/rs.3.rs-7749837/v1), 2025-11-18
Supplement: Supplementary file 1 [file b7b57b84882cc493d73f009e.docx]

**Table S.1. Analytical procedures applied for mechanistic insights into BSF processing and BJ cultivation.**

| **Process / Parameter** | **Methodology** | **Instrument / Reagent** | **Reference(s)** |
| --- | --- | --- | --- |
| **Stage I – BSF Processing** | | | |
| Larval ingestion & metal partitioning | Rearing 14 d (200 larvae kg⁻¹ soil),  separation of larvae/frass/residual substrate,  drying (60 °C, 48 h),  acid digestion (HNO₃/H₂O₂, 4:1 v/v),  ICP–MS quantification | ICP–MS (Agilent 7900) | (Jiu *et al.*, 2023) |
| Subcellular fractionation | Differential centrifugation:  1,000 × g (cell wall),  12,000 × g (mitochondria),  100,000 × g (microsomal/soluble) | Ultracentrifuge; ICP–MS | (Lu *et al.*, 2020) |
| Metallothioneins | Ellman’s reagent (DTNB) assay | Spectrophotometer (412 nm) | (Li *et al.*, 2023) |
| Antioxidant enzymes (GST, SOD, CAT) | GST (CDNB conjugation, 340 nm);  SOD (NBT inhibition, 560 nm);  CAT (H₂O₂ decomposition, 240 nm) | UV–Vis spectrophotometer | Bradford, 1976;  Wang & Shelomi, 2017 |
| Frass pH & composition | pH in 1:2.5 suspension;  Ca, P by ICP–MS after digestion | pH electrode; ICP–MS | Bulak et al., 2020 |
| Exchangeable fractions | Extraction with 1 M MgCl₂ (pH 7.0) | ICP–MS | Lalander et al., 2016 |
| TCLP leachability | EPA Method 1311,  acetic acid buffer (pH 4.93) | ICP–MS | U.S. EPA, 1992 |
| **Stage II – BJ Cultivation** | | | |
| Plant growth | 30 d in BSF-processed soil  (25 ± 2 °C, 16/8 h photoperiod, 65% RH) | Greenhouse | Singh & Prasad, 2019 |
| Antioxidant enzymes (SOD, CAT, POD) | Leaf extract (phosphate buffer, pH 7.0);  SOD (NBT inhibition, 560 nm);  CAT (H₂O₂, 240 nm);  POD (guaiacol oxidation, 470 nm) | UV–Vis spectrophotometer | Sharma et al., 2020 |
| Osmoprotectants | Proline (acid-ninhydrin, 520 nm);  soluble sugars (anthrone, 625 nm) | UV–Vis spectrophotometer | Bates et al., 1973;  Gill et al., 2016 |
| Root exudates (organic acids) | Hydroponic exudate collection (24 h),  filtration (0.22 µm),  HPLC analysis | HPLC (Agilent 1260 Infinity, C18, UV 210 nm) | Gupta et al., 2018;  Wang et al., 2021 |
| Subcellular sequestration | Fractionation into cell wall, organelle, soluble fractions;  metal analysis by ICP–MS | Ultracentrifuge; ICP–MS | Weigel & Jäger, 1980;  Clemens & Ma, 2016 |
